# Supplementary material
Source: PubMed Central journal article supplement (PMC3855549)
Supplement: NIHMS507917-supplement-SI.pdf [file NIHMS507917-supplement-SI.pdf]

Supporting Information for:

**A versatile platform for single and multiple unnatural amino acid mutagenesis in *Escherichia coli***

Abhishek Chatterjee, Sophie B. Sun, Jennifer L. Furman, Han Xiao and Peter G. Schultz\*

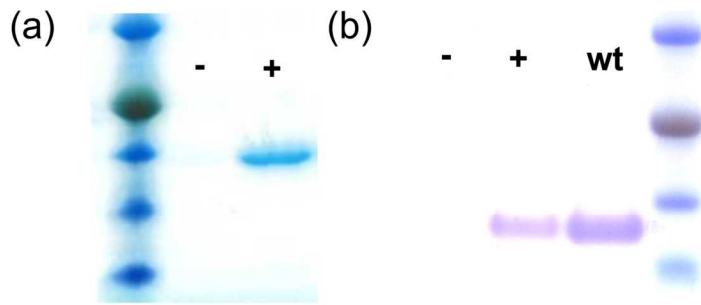

**Figure S1:** SDS-PAGE analysis of purified C-terminal (His)<sub>6</sub>-tagged T4-lysozyme (T4L; a) and ketosteroid isomerase (KSI; b), expressed from pET101-T4L(Asn68TAG) and pET28-KSI(His78TAG), respectively, using pUltra-pAcF to suppress the amber nonsense codon, in the presence (+) or absence (-) of 1 mM pAcF in the growth medium. For KSI, the wild type (wt) protein expression level (without amber suppression) is also shown.

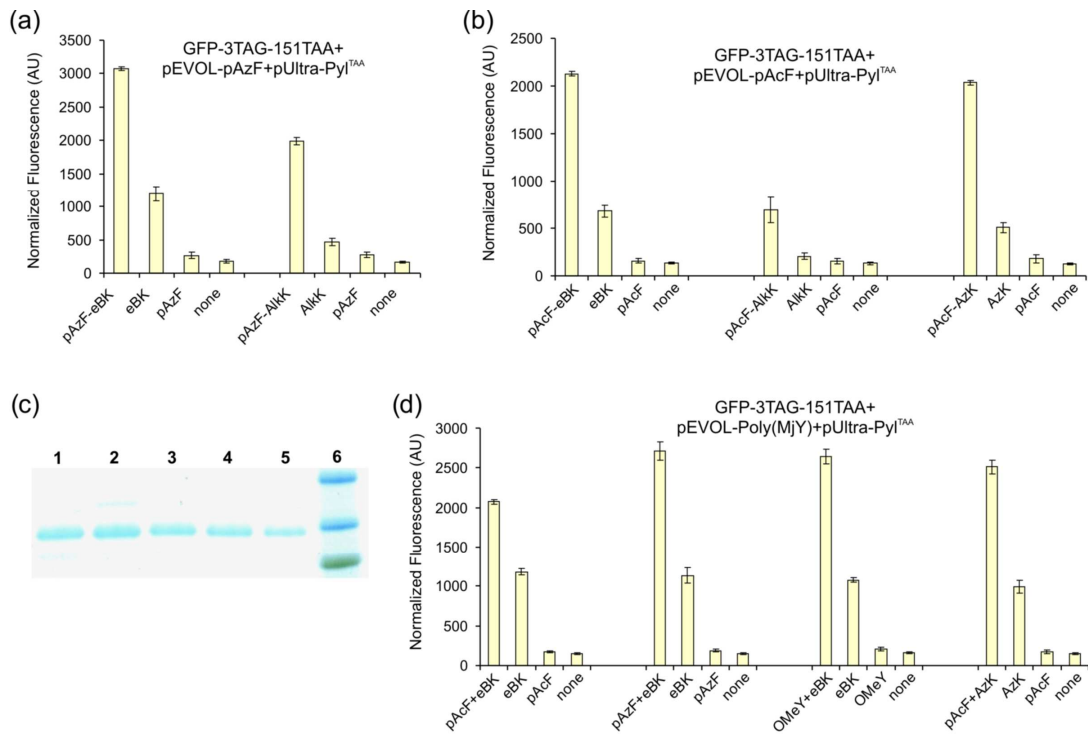

**Figure S2:** Expression of GFP from pET-GFP-3TAG-151TAA by dual-suppression using pEVOL-MjY (pAzF-specific, pAcF-specific or polyspecific) to suppress the TAG3 with pAzF, pAcF, or OMeY and pUltra-Pyl<sup>TAA</sup> to suppress TAA151 with eBK, AzK or AlkK. Normalized GFP fluorescence is reported in the presence of both UAAs, in the presence of either one of the two UAAs, and in the absence of both UAAs. (a) Incorporation pAzF and eBK, or pAzF and AlkK to TAG3 and TAA151, respectively, using pEVOL-pAzF and pUltra-Pyl. (b) Incorporation pAcF and eBK, pAcF and AlkK, or pAcF and AzK to TAG3 and TAA151, respectively, using pEVOL-pAcF and pUltra-Pyl. (c) SDS-PAGE analysis of purified GFP incorporating pAzF and eBK (1), pAcF and eBK (2), pAcF and AzK (3), pAzF and AlkK (4), or pAcF and AlkK (5). Lane 6 contains MW markers (d) Incorporation pAcF and eBK, pAzF and eBK, OMeY and eBK, or pAcF and AzK to TAG3 and TAA151, respectively, using pEVOL-polyspecific and pUltra-Pyl.



(a) GFP-3\*

ATGGCATAAGTAAAGGAGAAGAAGAACTTTTCACTGGAGTTGTCCCAATTCTTGTGAATTAGATGGTGATG  
TTAATGGGCACAAATTTTCTGTCACTGGAGAGGGTGAAGGTGATGCAACATACGGAAAACCTACCCTTAA  
ATTTATTTGCACTACTGGAAAACCTACCTGTTCCATGGCCAACACTTGTCACTACTTTCTCTTATGGTGTTC  
ATGCTTTTCCCGTTATCCGGATCACATGAAACGGCATGACTTTTTCAAGAGTGCCATGCCCGAAGGTTATG  
TACAGGAACGCACTATATCTTTCAAAGATGACGGGAACCTACAAGACGCGTGTGAAGTCAAGTTTGAAG  
GTGATACCCCTTGTAAATCGTATCGAGTTAAAAGGTATTGATTTTAAAGAAGATGGAAAACATTCTCGGACA  
CAAACCTCGAATACAACATAACTCACACTAGGTATAGATCACGGCAGACAAACAAAAGAATGGAATCAA  
AGCTAACTTCAAAAATTCGCCACAACATTGAAGATGGATCCGTTCAACTAGCAGACCATTATCAACAAAAT  
ACTCCAATTGGCGATGGCCCTGTCTTTTACCAGACAACCATTACCTGTGACACAATCTGCCCTTTCGAA  
AGATCCCAACGAAAAGCGTGACCACATGGTCCTTCTTGAGTTTGTAACTGCTGCTGGGATTACACATGGC  
ATGGATGAGCTCTACAACTCGAGCACCACCACCACCACCCTGA

(b) GFP-3TAG-151TAA

ATGGCATAAGTAAAGGAGAAGAAGAACTTTTCACTGGAGTTGTCCCAATTCTTGTGAATTAGATGGTGATG  
TTAATGGGCACAAATTTTCTGTCACTGGAGAGGGTGAAGGTGATGCAACATACGGAAAACCTACCCTTAA  
ATTTATTTGCACTACTGGAAAACCTACCTGTTCCATGGCCAACACTTGTCACTACTTTCTCTTATGGTGTTC  
ATGCTTTTCCCGTTATCCGGATCACATGAAACGGCATGACTTTTTCAAGAGTGCCATGCCCGAAGGTTATG  
TACAGGAACGCACTATATCTTTCAAAGATGACGGGAACCTACAAGACGCGTGTGAAGTCAAGTTTGAAG  
GTGATACCCCTTGTAAATCGTATCGAGTTAAAAGGTATTGATTTTAAAGAAGATGGAAAACATTCTCGGACA  
CAAACCTCGAATACAACATAACTCACACTAAGTATACATCACGGCAGACAAACAAAAGAATGGAATCAA  
AGCTAACTTCAAAAATTCGCCACAACATTGAAGATGGATCCGTTCAACTAGCAGACCATTATCAACAAAAT  
ACTCCAATTGGCGATGGCCCTGTCTTTTACCAGACAACCATTACCTGTGACACAATCTGCCCTTTCGAA  
AGATCCCAACGAAAAGCGTGACCACATGGTCCTTCTTGAGTTTGTAACTGCTGCTGGGATTACACATGGC  
ATGGATGAGCTCTACAACTCGAGCACCACCACCACCACCCTGA

(c) MbPylRS(opt)

ATGGATAAAAAACCGCTGGACGTTCTGATCTCCGCTACGGGTCTGTGGATGAGCCGCACGGGTACGCTGC  
ATAAAATTAACACCACGAAGTGTACGTTTCGAAAATCTATATCGAAAATGGCGTGCAGTATCTGCTGGT  
GGTTAACAATAGCCGTTCTTGTGCGCACCAGCGTGCCTTTCCGCCATCACAATACCGCAAAACGTTGAA  
TCTTGTGCGCGTGTAGATGAAGACATTAACAATTTCTGACCCGTAGTACGGAATCCAAAAACTCAGTGA  
AAGTTCGCGTGTGAGTGTCTCCGAAAGTTAAAAAAGCGATGCCGAAAAGTGTCTCCCGTGCCCCGAAAC  
CGCTGGAAAACCTAGTGTCCGCAAAAGCTTCCACCAATACGAGCCGCTCTGTTCCGTCGCCGCAAAAA  
GCACCCCGAACAGCTCTGTCCCGCAAGCGCACCGGCACCGTCTCTGACGCGTAGTACGCTGGATCGCGT  
GGAAGCCCTGCTGTCCCGGAAGACAAAATCTCACTGAATATGGCAAAACCGTTTCGTGAACTGGAACC  
GAACTGGTTACCCGTCGCAAAAACGATTTCCAACGTCTGTATACGAATGATCGCGAAGACTACCTGGGT  
AAACTGGAACGTGATATCACCAAATTTTCTGTTGACCGCGGCTTTCTGGAAATCAAATCTCCGATTCTGA  
TCCCGGCTGAATATGTTGAACGCATGGGTATTAACAATGATACCGAAGTGAAGTAAACAGATTTTTCGTT  
GGATAAAAAACCTGTGCTGCGGCCGATGCTGGCACCGACGCTGTATAATTACCTGCGTAAACTGGATCGC  
ATTCTGCCGGGTCCGATTAAAATCTTTGAAGTGGGCCGCTGTTATCGTAAAGAATCGGATGGCAAGAAC  
ACCTGGAAGAAATTTACCATGGTTAACTTCTGCCAAATGGGCAGCGGTTGTACGCGCGAAAATCTGGAAGC  
GCTGATCAAAGAATCCTGGATTACCTGGAAATCGACTTCAAAATCGTCCGGTATTCTTGCATGGTGTGG  
GCGATACCCTGGACATCATGCATGGTGACCTGGAAGTGAAGTCCGCTGTTGTGCGGTCCGGTCCAGCCTGGA  
TCGTGAATGGGGCATTGACAAACCGTGGATCGGCGCGGTTTTGGCCTGGAACCGCTGCTGAAAGTTATG  
CACGGCTTCAAAAACATCAAACGTGCGTCTCGTCCGAAATCGTATTACAACGGCATCTCAACCAATCTGT  
AATAA

(d) KSI-7TAA-78TAG

ATGAACCTGCCGACCGCTAAAGAGTCCAGGGTCTGATGGCGGTTTTTATTGAACTGGTGCATGTGGGGC  
ACATTGAAGCAATTGTGCAGATGTACGCGGACGATGCGACCGTTGAAAGCCCGTTTGGTCAACCACCGAT  
TCATGGCCGTGAACAGATTGCGGCGCACTACCGTCAGTGGCTGGGCGGGGTAAACTGCGTGTTCCTG  
ACCGGTCCAGTGCCTGCTAGTTAGAACGGCTGCGGCGCGATGCCGTTGCGTAAAGAGTGGGTTTGGAAATG  
GTCAGCCTTGCACAACGGATGTTATTCTGGTTATGCGCTTCGATGAACACGGTTCGATCCAGACCGAACA  
CGCTATTGGAGCGAAGTGAATCTGAGTGTACGCAACCGCAGGGCAGTCTCGAGCACCACCACCACCA  
CCAATGA

**Figure S4:** Nucleotide sequences of GFP-3\*, GFP-3TAG-151TAA, MbPylRS(opt) and KSI-7TAA-78TAG

**Table S1:** ESI-MS analyses of purified proteins incorporating single/double UAAs

| Protein         | UAAs               | Expected MW (Da) | Observed MW (Da) |
|-----------------|--------------------|------------------|------------------|
| wtGFP           | none               | 27710            | 27711            |
| GFP(Y151TAG)    | pAcF               | 27736            | 27737            |
| GFP(Y151TAG)    | OMeY               | 27724            | 27726            |
| GFP(Y151TAG)    | pAzF               | 27735            | 27737            |
| GFP(Y151TAG)    | pNO <sub>2</sub> F | 27739            | 27741            |
| GFP(Y151TAG)    | Tryptophan         | 27733            | 27733            |
| GFP(Y151TAG)    | Proline            | 27644            | 27644            |
| GFP-3*          | pAcF               | 28071            | 28073            |
| GFP-3*          | OMeY               | 28035            | 28036            |
| T4L (N68TAG)    | pAcF               | 19742            | 19743            |
| KSI(H78TAG)     | pAcF               | 16007            | 16006            |
| GFP(3TAG151TAA) | pAcF+eBK           | 28084            | 28083            |
| GFP(3TAG151TAA) | pAzF+eBK           | 28083            | 28082            |
| GFP(3TAG151TAA) | OMeY+eBK           | 28072            | 28071            |
| GFP(3TAG151TAA) | pAcF+AzK           | 28097            | 28097            |
| GFP(3TAG151TAA) | pAcF+AlkK          | 28066            | 28064            |
| GFP(3TAG151TAA) | pAzF+AlkK          | 28065            | 28064            |
| KSI(7TAA78TAG)  | pAcF+eBK           | 16133            | 16134            |
| KSI(7TAA78TAG)  | pAcF+AzK           | 16146            | 16146            |

**Table S2:** DNA oligomers used in this study

|              |                                                                                                                                 |
|--------------|---------------------------------------------------------------------------------------------------------------------------------|
| CDF-Mlu-F    | GGTCATCCAGCGGATAGTTAATGATCAGCCCACTGACGCG                                                                                        |
| CDF-Bsa-R    | CGCGCGCAGATCAGTTGGAAGAATTTGTCCACTACGTG                                                                                          |
| CDFi-F       | GTGAGCGGATAACAATTTACAAAGGAGGTGCGGCCGCTTTCACCTGCA<br>GGATCCGGCCATGGCGGCCACCAGGTACCACCGGCGCCTCAGGCATTTG<br>AGAAGCACACGGTCACACTGC  |
| CDFi-R       | GAAAGCGGCCGCACCTCCTTTGTGAAATTGTTATCCGCTCACAATTCCAC<br>ACATTATACGAGCCGATGATTAATTGTCAACAGCTCCCTAATGCAGGAGT<br>CGCATAAGGGAGAGCGTGC |
| rrnB-Not-F   | AATAATTGCGGCCGCGTTTTAAACGGTCTCCAGCTTGGCTGTTTTGGCGG                                                                              |
| rrnB-Sbf-R   | AATAATTCCTGCAGGCTAACAAGGATTATGGGGATGATTGATGACCGGG<br>AGC                                                                        |
| proK-F       | aaataatCCTGCAGGtaattccgcttgcacaatgtgagcaccgg                                                                                    |
| proK-R       | AATAAATccatggCAAATTCGACCCTGAGCTGCTCGAGCATGC                                                                                     |
| MjYRS-F      | aacaactGCGGCCGcatggacgaattgaaatgataaaagagaacacatctgaaattac                                                                      |
| MjYRS-R      | aacaactGCGGCCGctataatctcttttaattgctctaaaatctttataagttctc                                                                        |
| ScWRS-F      | aacaactGCGGCCGCATGAGCAACGACGAAACTGTAGAGAAAGTC                                                                                   |
| ScWRS-R      | aacaactGCGGCCGCTTACTTCTTTTCTTGCTTAGTTTTGGCTTAGGTGCG                                                                             |
| MbPylRS- F   | aataattGCGGCCGcatggataaaaaaccattagatgtttaatatctgcg                                                                              |
| MbPylRS-R    | aataattGCGGCCGctatagattggtgaaatcccattatagtaagattcgg                                                                             |
| MbPylOptRS-R | aataattgcggccgcttaTTACAGATTGGTTGAGATGCCGTTGTAATACGATTCCGA<br>GCG                                                                |
| MbPylOptRS-F | aataattgcggccgcATGGATAAAAAACCGCTGGACGTTCTGATCTCCGC                                                                              |
| PhPRS-F      | aacaactGCGGCCGCATGGTGGAGAGGAAGAGGTGGAGTGAGG                                                                                     |
| PhPRS-R      | aacaactGCGGCCGcttaATAGTTCTAGCGAATCTAGCTATAAACTTCGC                                                                              |
| Trp-tRNA-R   | CCCcccgcTTTAGAGgcgggAGCTCTACCATTGAGCCACCGCTTcaatcgggggcgc<br>atcttactgcgcagatac                                                 |
| Trp-tRNA-F   | GAGCTcccgcCTCTAAAgcgggGGGtTGCAGGTTCAATTCCTGcCCGTTTCACC<br>Aaattcgaagcctgctcaacg                                                 |
| Pro-tRNA-F   | CTGCGGCGcTctaGACGCCGTGACCCGAGTTCAAATCTCGGCGGCCCCACC<br>Aaattcgaagcctgctcaacg                                                    |
| Pro-tRNA-R   | CGGGTCACGGCGTctagAgCGCCGCAGGATCACCAGGCTACCCACGGCCC<br>Caatcgggggcgcatttactgcgcagatac                                            |

|                 |                                                                                                |
|-----------------|------------------------------------------------------------------------------------------------|
| Pyl-tRNA-F      | AtGGA <sup>c</sup> CTcTAAATCCGTTcAGCCGGGTTAGATTCCCGGGGTTTCCGCCAaatt<br>cgaaaagcctgctcaacg      |
| Pyl-tRNA-R      | CCCGGCTGAACGGATTTAGAGTCCATTCGATCTACATGATCAGGTTTCCaa<br>tgcggggcgcac <sup>t</sup> tactgcgagatac |
| MmPylT-TAA-F    | gaatggactttaa <sup>t</sup> ccgttcagccgggtag                                                    |
| MmPylT-TAA-R    | cggctgaacggatttaa <sup>g</sup> tccgttcgatctacatg                                               |
| MmPylT-U25C-F   | GTAGATCGAACGGACTTTAAATCCG                                                                      |
| MmPylT-U25C-R   | TTTAAAGTCCGTTTCGATCTACATGATC                                                                   |
| U2Ev-F          | aataattAAGCTTgcaatttatctctcaaatgtagcacctgaagtcagccc                                            |
| U2Ev-R          | aataattCTCGAGgcagtgtagccgtgtgcttctcaaatgcctgagg                                                |
| gfpTAGm-151.153 | CTCGAATACA <sup>A</sup> CTATAACTCACACtagGTAtagATCACGGCAGACAAACAA<br>AAGAATGG                   |
| gfpTAGm-3       | GGAATTCAGGAGCCCTTCACCATGgcatagAGTAAAGGAGAAGA <sup>A</sup> CTTTTC<br>ACTGGAG                    |
| gfpTAAm-151     | CTCGAATACA <sup>A</sup> CTATAACTCACACtaaGTATACATCACGGCAGACAAACA<br>AAAGAATGG                   |
| tacI-SalI-F     | aataattGTCGACggGAGCTGTTGACAATTAATCATCGGCTCGTATAATGTGTG<br>G                                    |
| tRNA-XhoI-R     | CAAATTCGACCCTGAGCTGCTCGAGCATGC                                                                 |
